# Supplementary material
Source: PubMed Central journal article supplement (PMC3026411)

Supplemental Figure 4

Vagal neural tube explants

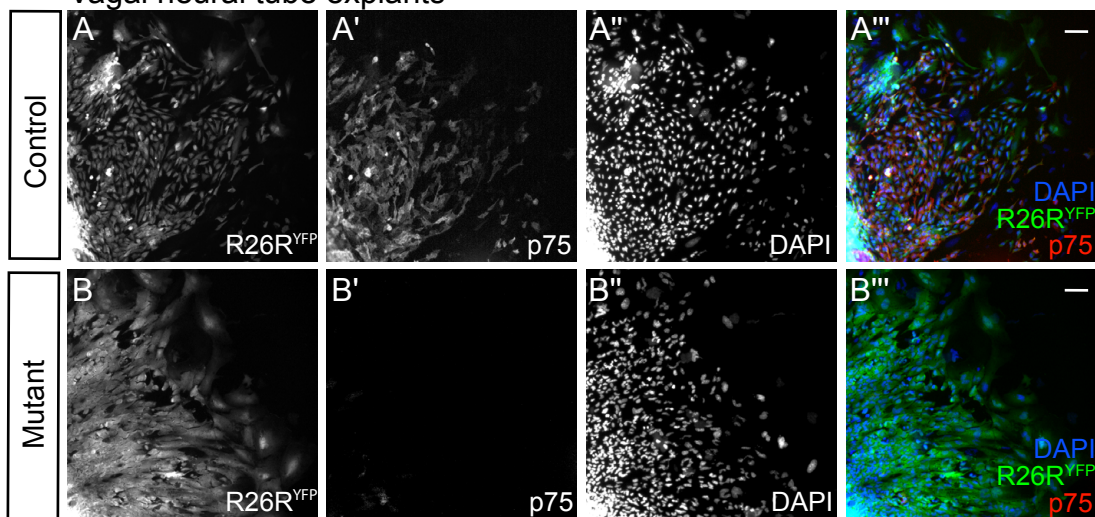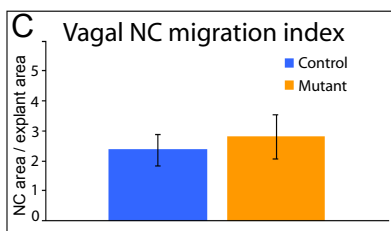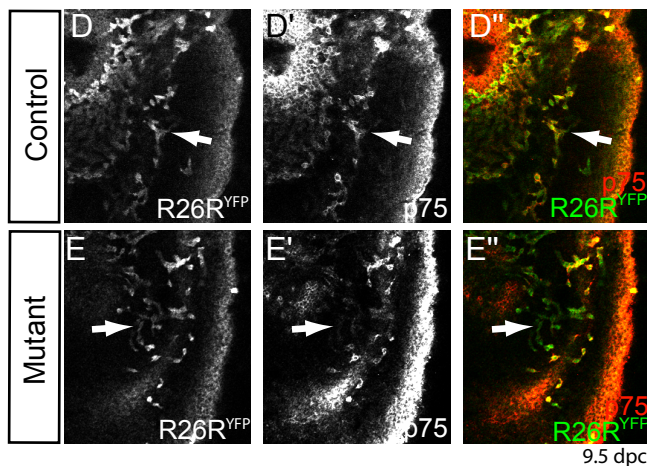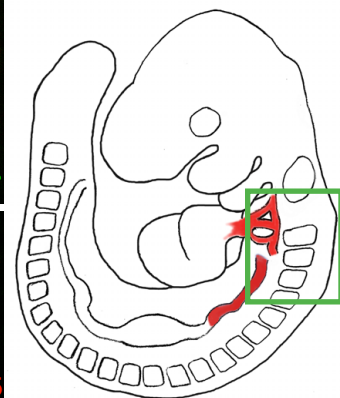

9.5 dpc

Trunk neural tube explants

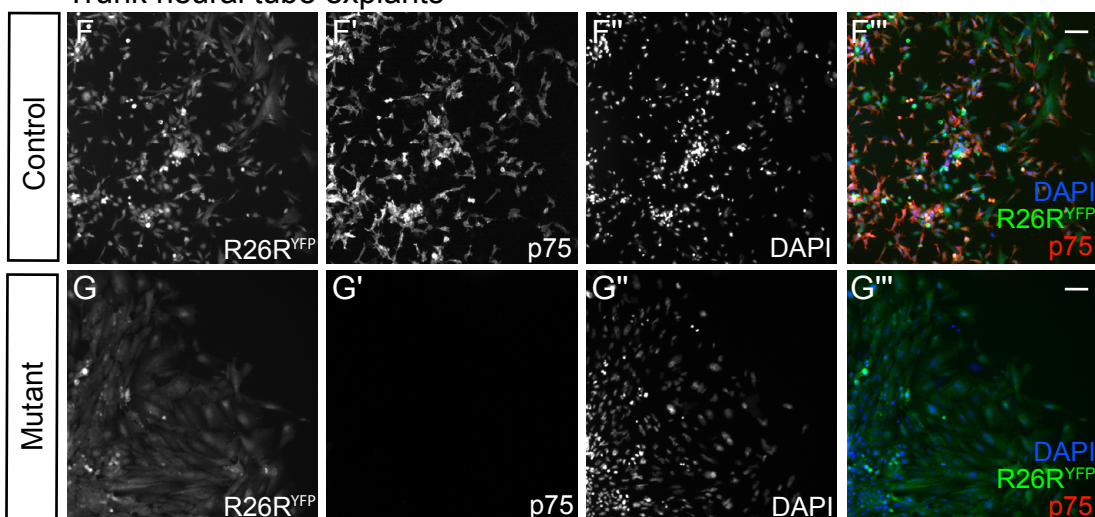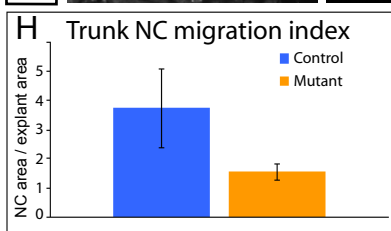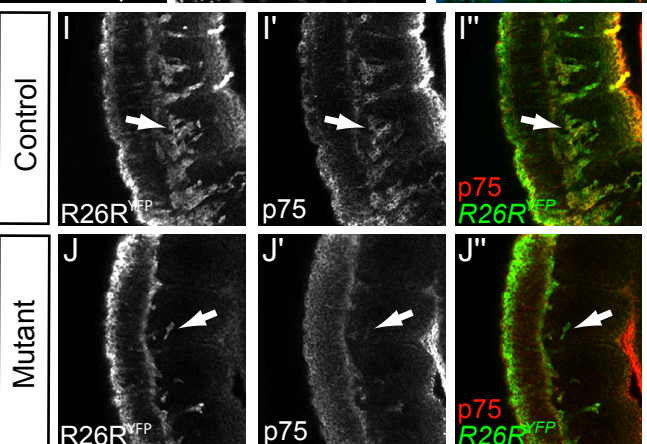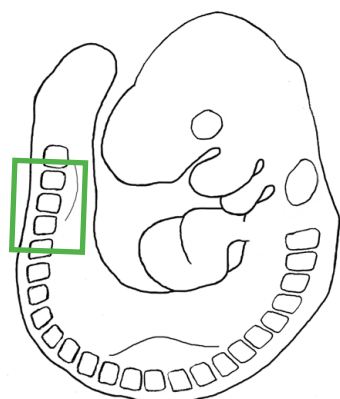

9.5 dpc

Supplement: supp_dev.054718_DEV054718FigS4.pdf [file supp_dev.054718_DEV054718FigS4.pdf]

# Supplemental Figure 7

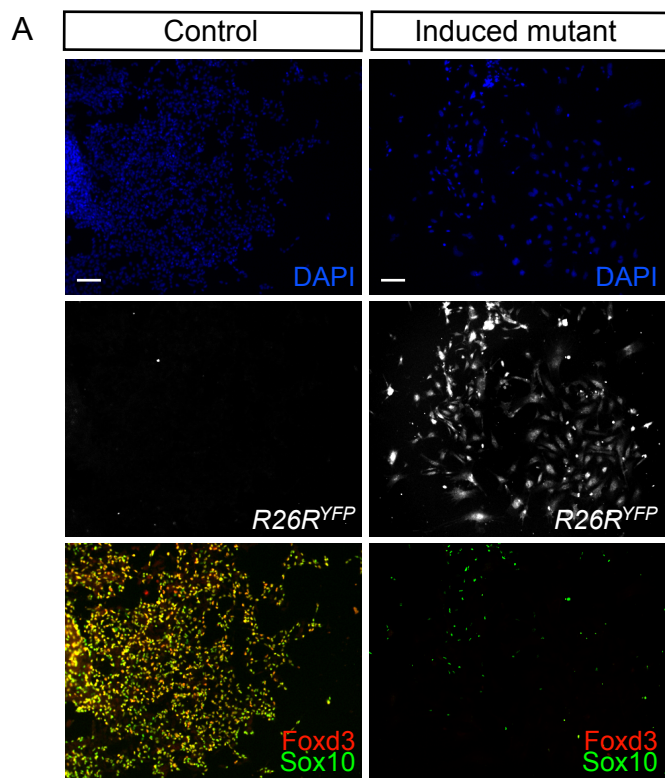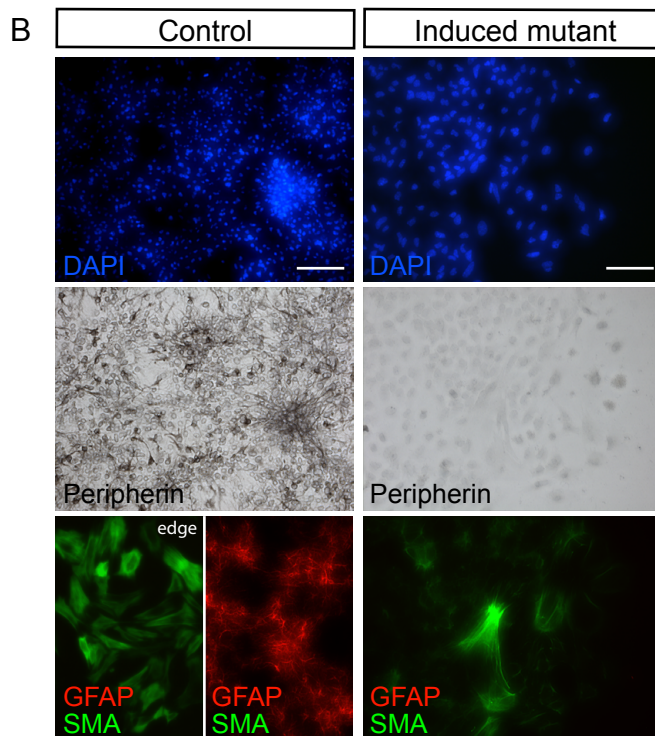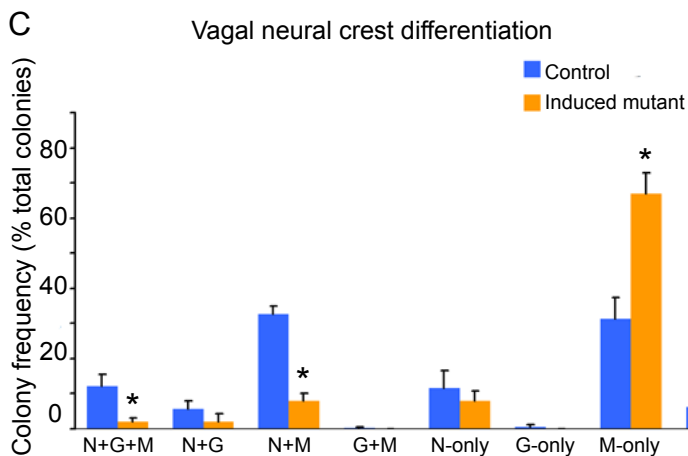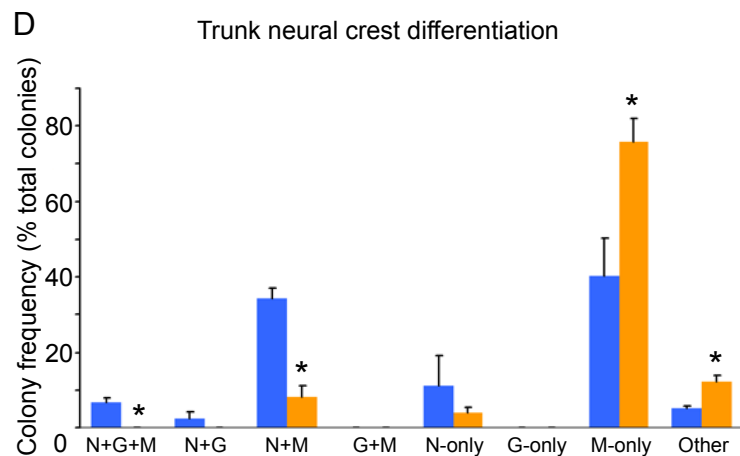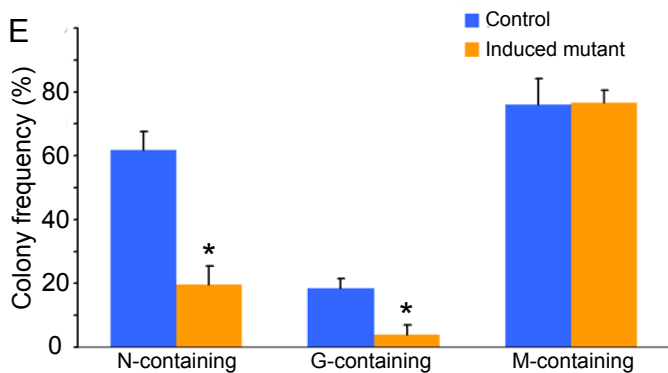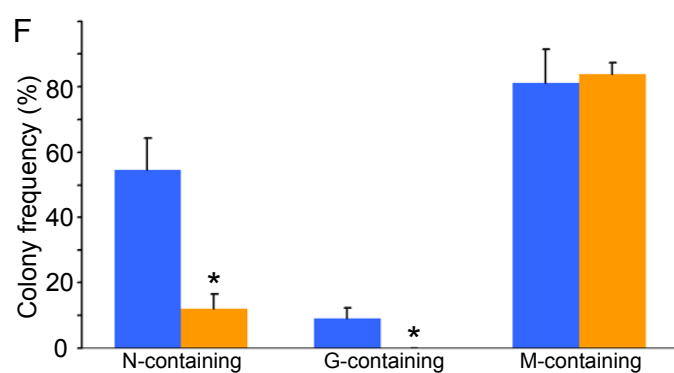

Supplement: supp_dev.054718_DEV054718FigS7.pdf [file supp_dev.054718_DEV054718FigS7.pdf]
